# Supplementary material
Source: PubMed Central journal article supplement (PMC9356324)
Supplement: NIHMS1815749-supplement-Supplemental_Method_Tables.pdf [file NIHMS1815749-supplement-Supplemental_Method_Tables.pdf]

# Supplemental Method Tables

Supplemental Method Table 1. PCR amplification and sequencing primers used for *ONECUT1* sequencing and phase determination of variants

**a. *ONECUT1* gene exon sequencing**

| Amplified Region | Map Position (hg19) |          |          | PCR amplification and sequencing primers (5'-3') |                      | Product size (bp) |
|------------------|---------------------|----------|----------|--------------------------------------------------|----------------------|-------------------|
|                  | Chr                 | Start    | End      | Forward                                          | Reverse              |                   |
| exon 1(5')       | 15                  | 53081496 | 53082200 | CTTGCTGGGAGTTGTGGATG                             | GAGAGGAAGGAAGGCAACAG | 705               |
| exon 1(3')       | 15                  | 53080900 | 53081609 | TCCTACCTTCCTCCTTTGG                              | TGGCCTCCATGAATAACCTC | 710               |
| exon 2           | 15                  | 53049374 | 53050223 | TACACCTTCGTGGCATGGTA                             | TCCAATTCTCATTCTGCT   | 850               |

Chr: chromosome; bp: base pairs.

**b. Primers used to determine the phase of *ONECUT1* variants P75A and P215A in one double-heterozygous subject**

| Primer orientation, allele specificity                 | Primer sequences 5'>3' | Map position (hg19) | Size (bp) | Allele determined                 |
|--------------------------------------------------------|------------------------|---------------------|-----------|-----------------------------------|
| P215A-forward, G-specific (WT, c.643C, p.P215A-P)      | GCTTCGAAGCCGTTGGg      | 53081423-53081439   | 466       | P75A, conditioned to P215A allele |
| P215A-forward, C-specific (variant, c.643G, p.P215A-A) | GCTTCGAAGCCGTTGGc      |                     |           |                                   |
| Reverse                                                | GCGGAGATTACCACCACCAC   | 53081869-53081888   |           |                                   |
| Forward                                                | GATGGTGCGGAGGAAGG      | 53081328-53081344   |           |                                   |
| P75A-reverse, G-specific (Ref, c.223C, p.P75A-P)       | ACCACCACCACGGGCCc      | 53081859-53081876   | 549       | P215A, conditioned to P75A allele |
| P75A-reverse, C-specific (Alt, c.223G, p.P75A-A)       | ACCACCACCACGGGCCg      |                     |           |                                   |

Allele-specific primers were designed to amplify across variants (P75A-P215A). Bases shown in lowercase are specific to each allele, as indicated. The size of the PCR-amplified fragment is shown. The allele of the second variant was determined by Sanger sequencing of the allele-specific PCR-amplified fragment. Ref: reference allele; Alt: alternative allele (for the low frequency P75A variant); WT: wild type (for the mutated/rare variants position).

Supplemental Method Table 2. List of guide and zinc finger sequences for gene editing

| Guide name            | Sequence                                                                                           |
|-----------------------|----------------------------------------------------------------------------------------------------|
| ONECUT1 crRNA guide 1 | 5' CAAAGAGGATCCGCGCCGTT 3'                                                                         |
| ONECUT1 crRNA guide 2 | 5' ACTTCAGCAGGGCGGCGACT 3'                                                                         |
| ONECUT1 ZFN 1         | 5' CAGCAAGGGCTCCCCACTATnCCCACCCGGGGGCCGCCATG 3'                                                    |
| ONECUT1 ZFN 2         | 5' CTTCGAAGCCCACCACCCGnnATGCTCGGCCGCCACGGGGA 3'                                                    |
| sgRNA E231            | 5' GCGUGAGGUGCUGCUCCCCG 3'                                                                         |
| ssDNA repair E231D    | CCCCAACGGCTTCGAAGCCCACCACCCGGCCATGCTCGGCCGACACGGGGACCAGCACCTCACGCCACCTCGGCCGGCATGGTGCCCATCAACGGCCT |

16

**Supplemental Method Table 3. PCR amplification/primers used for screening after gene editing**

| Amplified Region   | Map Position* |          |          | PCR amplification and sequencing primers (5'-3') |                        | Product size (bp)     |
|--------------------|---------------|----------|----------|--------------------------------------------------|------------------------|-----------------------|
|                    | Chr           | Start    | End      | Forward                                          | Reverse                |                       |
| CRISPR KO External | 15            | 53049137 | 53082451 | AAAGAGAATGCACTGGTTT<br>AGGTG                     | AGCCGGAGACCTCAGAATTTTA | 508 (KO) /33.315 (WT) |
| CRISPR KO Internal | 15            | 53077508 | 53078057 | TGGGCGAGACTTTCTCATGG                             | CGGTCACGAAATAACAGCGG   | 550                   |
| Indel + E231D      | 15            | 53081020 | 53081587 | CAGCCACTTCCACATCCTCC                             | TACCCCTACCACAAGGACG    | 568                   |

17

18

**Supplemental Method Table 4. List of primary antibodies**

| Primary Antibodies           | Host   | Company           | Catalogue Number   | Dilution   | Application    |
|------------------------------|--------|-------------------|--------------------|------------|----------------|
| GATA6                        | rabbit | Santa Cruz        | sc-9055            | -          | ChIP           |
| HNF6 (H100)                  | rabbit | Santa Cruz        | sc-13050           | -          | ChIP           |
| Flag (M2)-agarose conjugated | mouse  | Sigma             | A2220              | 1:2, 25 µl | CoIP           |
| Flag, M5                     | mouse  | Sigma             | F4042              | 1:10000    | CoIP, WB, EMSA |
| c-KIT-APC conjugated         | mouse  | Invitrogen        | CD11705            | 1:100      | FC             |
| CXCR4-PE conjugated          | mouse  | Life Technologies | MHCXCR404          | 1:33.33    | FC             |
| NKX6.1-647 conjugated        | mouse  | BD                | 563338             | 1:35       | FC             |
| PDX1-PE conjugated           | mouse  | BD                | 562161             | 1:35       | FC             |
| NKX6.1                       | mouse  | DSHB              | F55A12 concentrate | 1:150      | FC, IF         |
| NKX6.1                       | mouse  | DSHB              | F55A10 concentrate | 1:100      | IF             |
| PDX1                         | goat   | R&D               | AF2419             | 1:500      | FC, IF         |
| NANOG                        | rabbit | Cell Signaling    | #3580              | 1:100      | IF             |
| Oct3/4                       | mouse  | Santa Cruz        | sc-5279            | 1:200      | IF             |
| SOX17                        | goat   | R&D               | AF1924             | 1:500      | IF             |
| GFP (7.1 and 13.1)           | mouse  | Sigma             | 11814460001        | 1:1000     | WB             |
| HNF6 (H100X)                 | rabbit | Santa Cruz        | sc-13050           | 1:2000     | WB             |
| HNF6                         | rabbit | Abcam             | Ab186743           | 1:1000     | WB             |
| β-Actin                      | mouse  | Sigma             | A1978              | 1:5000     | WB             |
| β-Actin                      | mouse  | Sigma             | A5316              | 1:2000     | WB             |
| C-peptide                    | rabbit | Cell Signaling    | 4593               | 1:100      | FC, IF         |
| Glucagon                     | mouse  | Sigma             | G2654              | 1:500      | FC, IF         |

19

20

21

**Supplemental Method Table 5. List of secondary antibodies**

| Secondary Antibodies         | Host   | Company       | Catalogue Number | Dilution | Application |
|------------------------------|--------|---------------|------------------|----------|-------------|
| ECL anti-mouse-HRP linked    | sheep  | GE Healthcare | NA931V           | 1:5000   | CoIP, WB    |
| anti-goat AlexaFluor 488nm   | donkey | Invitrogen    | A11055           | 1:500    | FC, IF      |
| anti-mouse AlexaFluor 568nm  | donkey | Invitrogen    | A10037           | 1:500    | FC, IF      |
| anti-mouse AlexaFluor 647nm  | donkey | Invitrogen    | A31571           | 1:500    | IF          |
| anti-rabbit AlexaFluor 568nm | donkey | Invitrogen    | A10042           | 1:500    | IF          |
| ECL anti-mouse-HRP linked    | sheep  | GE Healthcare | NA9310V          | 1:5000   | WB          |
| ECL anti-rabbit-HRP linked   | donkey | GE Healthcare | NA9340V          | 1:5000   | WB          |

22

23

**Supplemental Method Table 6. Expression constructs for EMSA, Co-IP and Luciferase assays**

| cDNA          | pcDNA3-F1 | pcDNA3-GFP | Tag        |
|---------------|-----------|------------|------------|
| ONECUT1 WT    | x         | x          | N-terminus |
| ONECUT1 D26E  | x         | x          | N-terminus |
| ONECUT1 P215R | x         | x          | N-terminus |
| ONECUT1 K412R | x         | x          | N-terminus |
| ONECUT1 V242A | x         | x          | N-terminus |
| ONECUT1 E231D | x         | x          | N-terminus |
| ONECUT1 E231X | x         | x          | N-terminus |
| ONECUT1 G30S  | x         | x          | N-terminus |
| ONECUT1 H33Q  | x         | x          | N-terminus |
| ONECUT1 G81D  | x         | x          | N-terminus |
| NKX6.1        | x         | x          | N-terminus |
| NKX2.2        | x         | x          | N-terminus |
| GATA4         |           | x          | C-terminus |
| PDX1          |           | x          | N-terminus |
| GLIS3         | x         | x          | N-terminus |
| NGN3          | x         | x          | N-terminus |
| FOXA1         |           | x          | N-terminus |
| FOXA2         |           | x          | N-terminus |
| GATA6         |           | x          | N-terminus |
| PAX4          |           | x          | N-terminus |

24

25

26

## Supplemental Method Table 7. List of cell lines and respective modifications

| Parental cell line | Cell type (source)                        | Genotype / genetic modification                | Specification                                 |
|--------------------|-------------------------------------------|------------------------------------------------|-----------------------------------------------|
| HUES8              | hESC (Harvard University, HSCI iPS Core)  | ONECUT1 WT                                     | CRISPR control                                |
| HUES8              | hESC (Harvard University, HSCI iPS Core)  | ONECUT1 KO                                     | gene deletion                                 |
| HUES8              | hESC (Harvard University, HSCI iPS Core)  | ONECUT1 trunc                                  | frameshift after indel                        |
| HUES8              | hESC (Harvard University, HSCI iPS Core)  | ONECUT1 E231D                                  | point mutation                                |
| Patient-derived    | hiPSC                                     | ONECUT1 E231X                                  | point mutation                                |
| Patient-derived    | hiPSC                                     | ONECUT1 WT                                     | wild type                                     |
| CyT49              | hESC (ViaCyte, Inc. Stem Cell Derivation) | E1-NKX6.1-GFP                                  | enhancer reporter construct                   |
| CyT49              | hESC (ViaCyte, Inc. Stem Cell Derivation) | E2-NKX6.1-GFP                                  | enhancer reporter construct                   |
| CyT49              | hESC (ViaCyte, Inc. Stem Cell Derivation) | E3-NKX6.1-GFP                                  | enhancer reporter construct                   |
| HeLa               | tumor cell line (ATCC CCL2)               | GFP- and FLAG-tagged overexpression constructs | for reporter assays and cellular localization |
| HEK293             | tumor cell line (ATCC CRL 1573)           | GFP- and FLAG-tagged overexpression constructs | for IP assays                                 |

27

28

29

30

31

32

33

34

36

38

39

40

41
