# Supplementary material
Source: PubMed Central journal article supplement (PMC9356324)
Supplement: NIHMS1815749-supplement-Supplementary_Tables.pdf [file NIHMS1815749-supplement-Supplementary_Tables.pdf]

**Supplementary Tables - *ONECUT1* mutations and variants in diabetes**

## Supplementary Tables

**Supplementary Table 1. Glucose metabolism in *ONECUT1* heterozygous parents and grand-parents**

|                                    | Family 1           |                    |                           |                           | Family 2           |                    | Reference values                      |
|------------------------------------|--------------------|--------------------|---------------------------|---------------------------|--------------------|--------------------|---------------------------------------|
|                                    | Mother (subject 2) | Father (subject 1) | Grand-father (subject 22) | Grand-mother (subject 25) | Mother (subject 2) | Father (subject 1) |                                       |
| Age at study (years)               | 40                 | 38                 | 76                        | 63                        | 23                 | 29                 |                                       |
| BMI (kg/m <sup>2</sup> )           | 28.1               | 28.3               | NA                        | NA                        | 24.5               | 26.4               |                                       |
| HbA1c (%)                          | 6.6 <sup>a</sup>   | 5.4                | 6.9 <sup>a</sup>          | 6.0 <sup>b</sup>          | 6.1 <sup>b</sup>   | 6.2 <sup>b</sup>   | <5.7                                  |
| Autoantibodies (GAD, IA2, INS)     | Negative           | Negative           | ND                        | ND                        | Negative           | Negative           |                                       |
| Fasting glucose (mmol/l)           | 6.3 <sup>b</sup>   | 4.7                | 8.3 <sup>a</sup>          | 6.6 <sup>b</sup>          | 5.8 <sup>b</sup>   | 5.3                | <5.6                                  |
| Glucose 30 min (mmol/l)            | 13.9 <sup>a</sup>  | 6.6                | ND                        | ND                        | ND                 | ND                 | <9.7                                  |
| Glucose 60 min (mmol/l)            | 19.0 <sup>a</sup>  | 7.4                | ND                        | ND                        | 9.9                | 8.7                | <10.1                                 |
| Glucose 120 min (mmol/l)           | 15.8 <sup>a</sup>  | 5.8                | ND                        | ND                        | 9.1 <sup>b</sup>   | 9.2 <sup>b</sup>   | <7.8                                  |
| Fasting insulin (pmol/l)           | 62.5               | 34.7 <sup>b</sup>  | 74.3                      | 18.7 <sup>b</sup>         | 23.6 <sup>b</sup>  | 31.9 <sup>b</sup>  | 35-174                                |
| Fasting C-peptide (pmol/l)         | 733                | 766                | 1490                      | 728                       | ND                 | ND                 | 160–1100                              |
| Fasting Insulin/C-peptide          | 0.09               | 0.05               | 0.05                      | 0.03                      | ND                 | ND                 | <0.10                                 |
| Insulin 30 min (mIU/l)             | 28                 | 45                 | ND                        | ND                        | ND                 | ND                 | 27-60                                 |
| Insulin 60 min (mIU/l)             | 45                 | 79                 | ND                        | ND                        | ND                 | ND                 | 45-80                                 |
| Insulin 120 min (mIU/l)            | 37                 | 55                 | ND                        | ND                        | ND                 | ND                 | 35-65                                 |
| $\Delta I30/\Delta G30$ (mIU/mmol) | 3.7 <sup>a</sup>   | 21.1               | ND                        | ND                        | ND                 | ND                 | 16.9 ± 10.7 (NDC);<br>3.9 ± 2.3 (T2D) |

Glucose and insulin values shown are fasting, 30 min, 60 min, and 120 min after the start of oral glucose tolerance test (OGTT). Early insulin secretion ( $\Delta I30/\Delta G30$ ) was calculated as the ratio [(insulinemia at 30 min)-(fasting insulinemia)]/[(blood glucose at 30 min)-(fasting blood glucose)]. Reference values shown are American Diabetes Association (ADA) reference threshold as well as laboratory reference values during fasting and OGTT (insulin and C-peptide) and in non-diabetic control (NDC) and Type 2 diabetes (T2D) groups for  $\Delta I30/\Delta G30$ .

<sup>a</sup> Diabetes range; <sup>b</sup> Impaired fasting glucose (IFG)/Impaired glucose tolerance (IGT) range. NA: not available. ND: not done.

**Supplementary Table 2. Characteristics of T2D patients from the Ulm Diabetes Cohort**

|                    | N    | Mean  | SD    | Min  | 10 <sup>th</sup><br>centile | 25 <sup>th</sup><br>centile | Median | 75 <sup>th</sup><br>centile | 90 <sup>th</sup><br>centile | Max  |
|--------------------|------|-------|-------|------|-----------------------------|-----------------------------|--------|-----------------------------|-----------------------------|------|
| Age at diagnosis   | 2143 | 44.68 | 14.44 | 10   | 25                          | 35                          | 45     | 55                          | 63                          | 85   |
| BMI at recruitment | 1143 | 28.97 | 7.02  | 15.6 | 21.6                        | 24.2                        | 27.9   | 32.1                        | 37.7                        | 66.7 |
| BMI at diagnosis   | 660  | 27.66 | 6.48  | 15.6 | 20.8                        | 23.2                        | 26.4   | 30.7                        | 35.9                        | 62.8 |

SD: standard deviation; Min: minimum; Max: maximum.

**Supplementary Table 3. Ulm Diabetes Cohort (UDC) screening: *ONECUT1* exonic variant counts and allele frequencies**

**a. Rare variants**

| Genomic position (hg19)     | Nucleotide change | Amino acid change | T2D patients (N=2165) | Population controls (N=397) | T1D/LADA patients (N=162) | MAF, all (gnomAD) | Max MAF (gnomAD) | MAF, NWE (gnomAD) |
|-----------------------------|-------------------|-------------------|-----------------------|-----------------------------|---------------------------|-------------------|------------------|-------------------|
| 53082075                    | C/G               | <b>A3P</b>        | 1                     | 0                           | 0                         | 6.0E-06           | 4.2E-05          | 0                 |
| 53081994                    | C/T               | <b>G30S</b>       | 1                     | 0                           | 0                         | 0.0002            | 0.0037           | 0                 |
| 53081983                    | G/T               | <b>H33Q</b>       | 3                     | 0                           | 0                         | 0.0011            | 0.0022           | 0.0020            |
| 53081898                    | C/A               | <b>G62C</b>       | 1                     | 0                           | 0                         | 0                 | 0                | 0                 |
| 53081840                    | C/T               | <b>G81D</b>       | 1                     | 0                           | 0                         | 0.0003            | 0.0007           | 0.0002            |
| 53081836                    | G/A               | P82P              | 1                     | 0                           | 0                         | 0                 | 0                | 0                 |
| 53081796                    | C/A               | <b>G96C</b>       | 1                     | 0                           | 0                         | 0                 | 0                | 0                 |
| 53081795                    | C/T               | <b>G96D</b>       | 1                     | 0                           | 0                         | 0.0009            | 0.024            | 0.0010            |
| 53081745                    | G/C               | <b>P113A</b>      | 1                     | 0                           | 0                         | 0                 | 0                | 0                 |
| 53081677                    | C/T               | P135P             | 10                    | 3                           | 0                         | 0.0018            | 0.0034           | 0.0030            |
| 53081539                    | G/A               | P181P             | 1                     | 0                           | 0                         | 0                 | 0                | 0                 |
| 53081439                    | G/C               | <b>P215A</b>      | 1                     | 0                           | 0                         | 5.2E-05           | 6.5E-05          | 0                 |
| 53081277                    | G/C               | <b>R269G</b>      | 2                     | 0                           | 0                         | 0.0006            | 0.0011           | 0.0012            |
| 53081221                    | C/A               | G287G             | 16                    | 1                           | 0                         | 0.021             | 0.12             | 0.0044            |
| 53081152                    | G/A               | I310I             | 1                     | 0                           | 0                         | 9.9E-05           | 0.0011           | 0                 |
| 53050010                    | A/G               | D380D             | 1                     | 0                           | 0                         | 0                 | 0                | 0                 |
| 53049812                    | G/A               | D446D             | 3                     | 0                           | 0                         | 0.0002            | 0.0003           | 0                 |
| Rare nonsynonymous variants |                   |                   | 13                    | 0                           | 0                         |                   |                  |                   |
| Rare synonymous variants    |                   |                   | 33                    | 4                           | 0                         |                   |                  |                   |

Counts of heterozygous carriers of rare variants. MAF: minor allele frequency based on the genome aggregate database (gnomAD); Max MAF: maximum MAF across gnomAD populations; LADA: latent autoimmune diabetes in adult. NWE: North-Western Europeans. Missense variants are shown in bold.

**b. Common and low frequency missense variants**

| Genomic position (hg19) | Nucleotide change | Amino acid change | T2D patients (N=2165) | Population controls (N=397) | T1D/LADA patients (N=162) | MAF, all (gnomAD) | Max MAF (gnomAD) | MAF, NWE (gnomAD) |
|-------------------------|-------------------|-------------------|-----------------------|-----------------------------|---------------------------|-------------------|------------------|-------------------|
| 53081859                | G/C               | P75A              | 139 (6.42%)           | 16 (4.03%)                  | 14 (8.64%)                | 0.023             | 0.054            | 0.032             |

Counts are the sum of heterozygous and homozygous subjects for the minor allele, excluding subjects carrying rare missense variants.

**Supplementary Table 4. *ONECUT1* variants characteristics**

**a. Rare homozygous variants identified in two neonatal or young onset diabetic patients**

|     |               |       |     |     |           | EVS, MAF |    |     |                 | gnomAD, MAF |         |            |                       | gnomAD, NWE |                 | Deleteriousness prediction programs*** |           |     |           |             |            |        |
|-----|---------------|-------|-----|-----|-----------|----------|----|-----|-----------------|-------------|---------|------------|-----------------------|-------------|-----------------|----------------------------------------|-----------|-----|-----------|-------------|------------|--------|
| Chr | Position hg19 | dbSNP | Ref | Alt | AA change | EA       | AA | All | Nb homozygous/N | All         | Max MAF | Population | Nb homozygous/N (all) | MAF         | Nb homozygous/N | SIFT                                   | Polyphen2 | LRT | MutTaster | FATHM M-MKL | CADD_phred | CONDEL |
| 15  | 53081391      |       | C   | A   | E231X     | 0        | 0  | 0   | Absent          | 0           | 0       | -          | Absent                | 0           | Absent          | Protein-truncating variant             |           |     |           |             |            |        |
| 15  | 53081389      |       | C   | G   | E231D     | 0        | 0  | 0   | Absent          | 0           | 0       | -          | Absent                | 0           | Absent          | T                                      | B         | D   | D         | D           | N          | N      |

**b. Rare heterozygous missense variants identified by screening T2D patients (GnomAD-NWE MAF<0.005)**

|     |               |              |     |     |           | EVS, MAF |        |        |                 | gnomAD, MAF |          |            |                       | gnomAD, NWE |                 | Deleteriousness prediction programs*** |           |     |           |             |            |        |
|-----|---------------|--------------|-----|-----|-----------|----------|--------|--------|-----------------|-------------|----------|------------|-----------------------|-------------|-----------------|----------------------------------------|-----------|-----|-----------|-------------|------------|--------|
| Chr | Position hg19 | dbSNP        | Ref | Alt | AA change | EA       | AA     | All    | Nb homozygous/N | All         | Max MAF  | Population | Nb homozygous/N (all) | MAF         | Nb homozygous/N | SIFT                                   | Polyphen2 | LRT | MutTaster | FATHM M-MKL | CADD_phred | CONDEL |
| 15  | 53082075      | -            | C   | G   | A3P       | 0        | 0      | 0      | Absent          | 6.07E-06    | 4.22E-05 | SAS        | 0 / 82405             | 0           | 0 / 8897        | T                                      | B         | D   | D         | D           | 20.2 (D)   | N      |
| 15  | 53081994      | rs367600429  | C   | T   | G30S      | 0        | 0.0019 | 0.0006 | 0 / 5131        | 4.17E-04    | 0.0037   | AFR        | 0 / 67127             | 0           | 0 / 9525        | T                                      | B         | D   | N         | D           | 17.03 (D)  | N      |
| 15  | 53081983      | rs202151356  | G   | T   | H33Q      | 0.0003   | 0.0018 | 0.0008 | 0 / 5164        | 1.04E-03    | 0.0022   | ASJ        | 1 / 51947**           | 3.77E-04    | 0 / 7952        | D                                      | P         | D   | D         | D           | 23.5 (D)   | D      |
| 15  | 53081898      | rs201056913  | C   | A   | G62C      | 0        | 0      | 0      | Absent          | 1.60E-05    | 1.90E-04 | EAS        | 0 / 62373             | 0           | 0 / 8002        | D                                      | D         | D   | D         | D           | 26.3 (D)   | D      |
| 15  | 53081840      | rs142641519  | C   | T   | G81D      | 0.0003   | 0      | 0.0002 | 0 / 6485        | 2.09E-04    | 6.77E-04 | AMR        | 0 / 112424            | 5.34E-05    | 0 / 18712       | D                                      | D         | D   | D         | D           | 24.4 (D)   | D      |
| 15  | 53081796      | -            | C   | A   | G96C      | 0        | 0      | 0      | Absent          | 0           | 0        | 0          | Absent                | 0           | Absent          | D                                      | D         | D   | D         | D           | 29.6 (D)   | D      |
| 15  | 53081795      | rs145201345  | C   | T   | G96D      | 0.0014   | 0      | 0.0009 | 0 / 6487        | 8.29E-04    | 0.024    | ASJ        | 6 / 123093*           | 2.15E-04    | 0 / 20955       | D                                      | D         | D   | D         | D           | 27.7 (D)   | D      |
| 15  | 53081745      | -            | G   | C   | P113A     | 0        | 0      | 0      | Absent          | 0           | 0        | 0          | Absent                | 0           | Absent          | T                                      | B         | D   | D         | D           | 22.9 (D)   | N      |
| 15  | 53081439      | rs1477846694 | G   | C   | P215A     | 0        | 0      | 0      | Absent          | 3.19E-05    | 6.49E-05 | NFE        | 0 / 15683             | 1.16E-04    | 0 / 4296        | T                                      | P         | D   | D         | D           | 19.07 (D)  | N      |
| 15  | 53081277      | rs139802359  | G   | C   | R269G     | 0.0016   | 0.0002 | 0.0012 | 0 / 6487        | 5.96E-04    | 0.0011   | FIN        | 0 / 136850            | 8.12E-04    | 0 / 25262       | D                                      | D         | D   | D         | D           | 25 (D)     | D      |

**c. Rare heterozygous synonymous variants identified by screening T2D patients (GnomAD-NWE MAF<0.005)**

| Chr | Position hg19 | dbSNP       | Ref | Alt | AA change | EVS, MAF |        |          |                 | gnomAD, MAF |          |            |                 | gnomAD, NWE |                 |
|-----|---------------|-------------|-----|-----|-----------|----------|--------|----------|-----------------|-------------|----------|------------|-----------------|-------------|-----------------|
|     |               |             |     |     |           | EA       | AA     | ALL      | Nb homozygous/N | All         | Max MAF  | Population | Nb homozygous/N | MAF         | Nb homozygous/N |
| 15  | 53081836      | -           | G   | A   | P82P      | 0        | 0      | 0        | Absent          | 0           | 0        | -          | Absent          | 0           | Absent          |
| 15  | 53081677      | rs146677141 | C   | T   | P135P     | 0.0031   | 0.0007 | 0.0023   | 1 / 6486        | 1.75E-03    | 0.0034   | NFE        | 0 / 139966      | 0.003       | 0 / 24972       |
| 15  | 53081539      | -           | G   | A   | P181P     | 0        | 0      | 0        | Absent          | 0           | 0        | -          | Absent          | 0           | Absent          |
| 15  | 53081221      | rs2075613   | C   | A   | G287G     | 0.0038   | 0.003  | 0.0035   | 0 / 6487        | 0.021       | 0.12     | EAS        | 269 / 138897    | 0.0044      | 0 / 25353       |
| 15  | 53081152      | rs145547859 | G   | A   | I310I     | 1.16E-04 | 0      | 7.70E-05 | 0 / 6487        | 9.91E-05    | 0.0011   | ASJ        | 0 / 141249      | 0           | 0 / 25401       |
| 15  | 53050010      | -           | A   | G   | D380D     | 0        | 0      | 0        | Absent          | 0           | 0        | -          | Absent          | 0           | Absent          |
| 15  | 53049812      | rs141094636 | G   | A   | D446D     | 0        | 0      | 0        | Absent          | 1.95E-04    | 3.27E-04 | NFE        | Absent          | 0           | Absent          |

**d. Rare heterozygous missense variants identified as a mutation occurring de novo in a juvenile-onset non-autoimmune diabetic patient**

| Chr | Position hg19 | dbSNP | Ref | Alt | AA change | EVS, MAF |    |     |                 | gnomAD, MAF |         |            |                       | gnomAD, NWE |                 | Deleteriousness prediction programs*** |           |     |         |            |            |         |   |
|-----|---------------|-------|-----|-----|-----------|----------|----|-----|-----------------|-------------|---------|------------|-----------------------|-------------|-----------------|----------------------------------------|-----------|-----|---------|------------|------------|---------|---|
|     |               |       |     |     |           | EA       | AA | ALL | Nb homozygous/N | All         | Max MAF | Population | Nb homozygous/N (all) | MAF         | Nb homozygous/N | SIFT                                   | Polyphen2 | LRT | MutTast | FATHMM-MKL | CADD_phred | CONDEL  |   |
| 15  | 53081438      | -     | G   | C   | P215R     | 0        | 0  | 0   | Absent          | 0           | 0       | -          | Absent                | 0           | Absent          | D                                      | D         | D   | D       | D          | D          | 24.9(D) | D |

\* 3 of these homozygous subjects were labeled as "controls" in case/control studies from gnomAD.

\*\* This homozygous subject was labeled as a "control" in a case/control study from gnomAD.

\*\*\*SIFT, POLYPHEN2(HDIV), LRT and MutationTaster (MutTast) are function prediction tool, and FATHMM, CADD and CONDEL are consensus methods that integrate several prediction tools. CADD\_phred scores >15 may be considered deleterious (CADD information).

Ref: reference allele; Alt: alternative allele; AA; amino acid; MAF: minor allele frequency; N: number of subjects sequenced; Nb: number; D: damaging, P: possibly damaging, T: tolerated, N: neutral, B: benign.

Databases: EVS: Exon Variant Server; gnomAD: genome aggregation database. Populations: EA: European American, AA: African American, NFE: Non-Finnish European, FIN: Finnish, ASJ: Ashkenazi Jewish, AMR: Latino/Admixed American, AFR: African/African American, EAS: East Asian, SAS: South Asian, NWE: North-Western European subgroup from NFE population.

**Supplementary Table 5. Burden testing for T2D, all *ONECUT1* coding variants**

| Population       | Additive burden test<br>(P-value, OR) | Collapsing burden test<br>(P-value, OR) | SKAT<br>(P-value) | SKAT-O<br>(P-value) | Variable threshold<br>burden test<br>(P-value) |
|------------------|---------------------------------------|-----------------------------------------|-------------------|---------------------|------------------------------------------------|
| All              | 0.10, 1.13                            | 0.08, 1.14                              | 0.00026           | 0.00027             | 0.005                                          |
| African-American | 0.04, 1.49                            | 0.04, 1.49                              | NA                | NA                  | NA                                             |
| East-Asian       | 0.17, 0.62                            | 0.17, 0.62                              |                   |                     |                                                |
| <b>European</b>  | <b>0.0027, 1.30</b>                   | <b>0.002, 1.31</b>                      |                   |                     |                                                |
| Hispanic         | 0.093, 0.75                           | 0.12, 0.77                              |                   |                     |                                                |
| South-Asian      | 0.063, 0.61                           | 0.063, 0.61                             |                   |                     |                                                |

All coding variants affecting *ONECUT1* RefSeq were selected (N=86 variants). OR: odds ratios.

Burden testing was performed using various programs available on the T2D Knowledge Portal web site (<http://www.type2diabetesgenetics.org/>; date: 10/2020): Additive burden test (counts variants to generate a significance score that is proportional to the number of variants); Collapsing burden test (test for association between the total number of rare alleles observed per individual and a trait); SKAT (variance component test); SKAT-O (robust test that combines burden and SKAT methods); and Variable threshold burden test (runs successive collapsing burden tests across a range of minor allele frequencies, selecting the optimal statistic adaptively). Additive, collapsing and variable threshold burden tests assume effects that are all predisposing. SKAT and SKAT-O allow variants with opposite effects (predisposing or protecting). SKAT and SKAT-O burden tests are more powerful when combining rare variants that both increase and decrease the risk. We used ancestry stratification for these analyses.

NA: not available.

**Supplementary Table 6. Partial extract from Type 2 Diabetes Knowledge Portal association analysis of selected rare *ONECUT1* variants**

**a. AMP T2D-GENES**

| Genomic position (hg19)                            | Nucleotide change | Amino acid change | MAF ALL (gnomAD) | Max MAF (gnomAD) | MAF NWE (gnomAD) | Minor allele count (all) | Minor allele frequency (cases) | Association P-value | Odds ratio | Case minor allele counts (N=19852) | Control minor allele counts (N=23273) |
|----------------------------------------------------|-------------------|-------------------|------------------|------------------|------------------|--------------------------|--------------------------------|---------------------|------------|------------------------------------|---------------------------------------|
| <b>Rare variants shared with the AMP T2D-GENES</b> |                   |                   |                  |                  |                  |                          |                                |                     |            |                                    |                                       |
| 53081994                                           | C/T               | G30S              | 0.0002           | 0.0037           | 0                | 23                       | 0.00044                        | 0.16                | 9.8        | 18                                 | 5                                     |
| 53081983                                           | G/T               | H33Q              | 0.0011           | 0.0022           | 0.002            | 91                       | 0.0020                         | 0.079               | 5.0        | 50                                 | 41                                    |
| 53081898                                           | C/A               | G62C              | 0                | 0                | 0                | 3                        | 0.000044                       | 0.54                | 4.1        | 3                                  | 0                                     |
| 53081840                                           | C/T               | G81D              | 0.0003           | 0.0007           | 0.0002           | 35                       | 0.00040                        | 0.59                | 0.8        | 16                                 | 19                                    |
| 53081795                                           | C/T               | G96D              | 0.0009           | 0.0241           | 0.001            | 52                       | 0.00056                        | 0.011               | 0.3        | 16                                 | 36                                    |
| 53081277                                           | G/C               | R269G             | 0.0006           | 0.0011           | 0.0012           | 41                       | 0.00042                        | 0.47                | 1.3        | 20                                 | 21                                    |
| <b>Population-specific variant (East-Asian)</b>    |                   |                   |                  |                  |                  |                          |                                |                     |            |                                    |                                       |
| 53081357                                           | A/G               | V242A*            | 0.0011           | 0.0145           | 0                | 176                      | 0.0051                         | 0.026               | 1.4        | 101                                | 75                                    |

These results were extracted from [www.type2diabetesgenetics.org/variantSearch/](http://www.type2diabetesgenetics.org/variantSearch/) for *ONECUT1* on 12/6/2019, for a population size of 49147 subjects.

\*Data for the V242A variant were not available in this specific analysis and data shown were extracted from [www.type2diabetesgenetics.org/variantInfo/](http://www.type2diabetesgenetics.org/variantInfo/) on 12/6/2019.

**b. DIAMANTE**

| Amino acid change                         | P-value | Odds ratio | Effective sample size | Minor allele frequency (cases) |
|-------------------------------------------|---------|------------|-----------------------|--------------------------------|
| <b>Rare variants shared with DIAMANTE</b> |         |            |                       |                                |
| G96D                                      | 0.40    | 0.81       | 107655                | 0.0018                         |
| R269G                                     | 0.55    | 1.06       | 203107                | 0.0014                         |



**Supplementary Table 7. Distributions of age at diabetes diagnosis and BMI in patients heterozygous for rare *ONECUT1* coding variants**

**a. Age at diagnosis of diabetes**

| N  | Median | Min | 10 <sup>th</sup> centile | 25 <sup>th</sup> centile | 75 <sup>th</sup> centile | 90 <sup>th</sup> centile | Max |
|----|--------|-----|--------------------------|--------------------------|--------------------------|--------------------------|-----|
| 17 | 29     | 12  | 18.4                     | 23.5                     | 37                       | 44.6                     | 47  |

**b. BMI**

| N              | Median | Min  | 10 <sup>th</sup> centile | 25 <sup>th</sup> centile | 75 <sup>th</sup> centile | 90 <sup>th</sup> centile | Max  |
|----------------|--------|------|--------------------------|--------------------------|--------------------------|--------------------------|------|
| At recruitment |        |      |                          |                          |                          |                          |      |
| 16             | 26.5   | 20.2 | 22.1                     | 24.2                     | 30.1                     | 36.4                     | 37.3 |
| At diagnosis   |        |      |                          |                          |                          |                          |      |
| 12             | 26.5   | 20.2 | 21                       | 24.6                     | 29.5                     | 30.1                     | 30.1 |

Patients are *ONECUT1* heterozygous diabetic subjects from the UDC cohort, completed by 4 additional *ONECUT1* heterozygous subjects (three diabetic/IFG/IGT parents of families 1 and 2 and one Lebanese juvenile-onset diabetic patient). N: total number of subjects in each group and subgroup, Min: minimum, Max: maximum.

**Supplementary Table 8. Burden testing in selected T2D patients adjusted to the characteristics of *ONECUT1* heterozygous patients identified in our study**

| Subjects, subgroups                                      | P-value | OR   | <i>ONECUT1</i> heterozygous subjects |     |       |
|----------------------------------------------------------|---------|------|--------------------------------------|-----|-------|
|                                                          |         |      | %                                    | n   | N     |
| Controls, unselected                                     |         |      | 0.81%                                | 188 | 23273 |
| Cases, age 12-35                                         | 0.41    | 1.77 | 0.70%                                | 4   | 575   |
| Cases, BMI 20-35                                         | 0.0018  | 1.53 | 1.30%                                | 93  | 7164  |
| Cases, fasting insulin 18-70                             | 0.0078  | 2.32 | 1.36%                                | 12  | 882   |
| Cases, age 12-35 and BMI 20-35                           | 0.0015  | 22.3 | 3.85%                                | 3   | 78    |
| Cases, age 12-35 and fasting insulin 18-70               | 0.0020  | 38.6 | 11.80%                               | 2   | 17    |
| Cases, age 12-35 and BMI 20-35 and fasting insulin 18-70 | NR*     | NR*  | 20%                                  | 2   | 10    |

Burden testing was performed in selected subgroups of patients from the AMP T2D-GENES cohort, using the tool "custom aggregation tests" available online on the AMP-T2D web site ([www.type2diabetesgenetics.org](http://www.type2diabetesgenetics.org); date 10/2020). Patients were selected based on various criteria to best represent T2D patients heterozygous for *ONECUT1* coding variants identified in our screening, depending on age, BMI and fasting insulin. In the absence of age at onset available in this cohort, we used the age at recruitment as a surrogate. In the absence of BMI at onset available in this cohort, we used the BMI at recruitment from our patients as selection values (normal/non-obese range). Range for age is in years, fasting insulin in pmol/l.

The number (n) and percentage (%) of *ONECUT1* heterozygous carriers is shown, and the total number of subjects (N) in the selection criteria. P-values and odds ratios (OR) are in comparison to unselected controls, using all populations, stratified by ancestry. Variants included for analysis are all rare coding variants (MAF<0.01) affecting the *HNF6/ONECUT1* RefSeq canonical transcript (NM\_004498.2, 85 variants).

\*NR (not reported): not reliable test, due to small sample size.

**Supplementary Table 9. Metabolic traits association in *ONECUT1* genomic region**

|                                   |                                           | SNP                                        |     | rs2456530 |     | rs75332279 |     | rs2440374 |     | rs7178476 |     |
|-----------------------------------|-------------------------------------------|--------------------------------------------|-----|-----------|-----|------------|-----|-----------|-----|-----------|-----|
|                                   |                                           | T2D risk allele frequency(EU, non-Finnish) |     | 0.118     |     | 0.0877     |     | 0.253     |     | 0.260     |     |
| Traits                            | Study                                     | P-value                                    | Dir | P-value   | Dir | P-value    | Dir | P-value   | Dir | P-value   | Dir |
| <b>T2D, BMI, obesity</b>          |                                           |                                            |     |           |     |            |     |           |     |           |     |
| Type 2 diabetes                   | DIAMANTE (European) T2D GWAS              | 4.7E-09                                    | ↑   | 5.8E-09   | ↑   | 4.3E-08    | ↑   | 7.4E-08   | ↑   |           |     |
| Type 2 diabetes adj BMI           | DIAMANTE (European) T2D GWAS              | 1.1E-06                                    | ↑   | 1.4E-07   | ↑   | 1.3E-05    | ↑   | 2.3E-05   | ↑   |           |     |
| BMI                               | GIANT UK Biobank GWAS                     | 4.7E-08                                    | ↑   | 0.0036    | ↑   | 1.4E-08    | ↑   | 1.4E-09   | ↑   |           |     |
| Waist-hip ratio                   | GIANT-UK Biobank GWAS Meta-analysis       | 2.7E-10                                    | ↑   | 1.8E-06   | ↑   | 1.8E-08    | ↑   | 1.6E-08   | ↑   |           |     |
| Waist-hip ratio adj BMI           | GIANT-UK Biobank GWAS Meta-analysis       | 6.9E-06                                    | ↑   | 0.0017    | ↑   | 0.00014    | ↑   | 0.00050   | ↑   |           |     |
| Body fat percentage               | GIANT UK Biobank GWAS                     | 3.8E-10                                    | ↑   | 8.8E-07   | ↑   | 1.2E-11    | ↑   | 1.4E-11   | ↑   |           |     |
| Childhood obesity                 | Early Growth Genetics Consortium GWAS     | 0.00015                                    | ↑   | ND        |     | 0.09       | 0   | 0.15      | ↑   |           |     |
| <b>Glycemic traits</b>            |                                           |                                            |     |           |     |            |     |           |     |           |     |
| Fasting insulin adj BMI           | AAGILE GWAS                               | 0.18                                       | ↓   | ND        |     | 0.02       | ↓   | 0.068     | 0   |           |     |
| Insulin secretion rate            | IVGTT-Based Insulin Secretion GWAS        | 0.77                                       | ↑   | 0.70      | ↓   | 0.18       | ↓   | 0.028     | ↓   |           |     |
| Insulin secretion rate adj BMI    | IVGTT-Based Insulin Secretion GWAS        | 0.71                                       | ↑   | 0.73      | ↓   | 0.20       | ↓   | 0.029     | ↓   |           |     |
| Two-hour insulin                  | MAGIC GWAS                                | 0.14                                       | ↑   | ND        |     | 0.013      | ↑   | 0.068     | 0   |           |     |
| HOMA-IR                           | MAGIC GWAS                                | 0.15                                       | ↑   | ND        |     | 0.048      | ↑   | 0.067     | 0   |           |     |
| Insulin sensitivity               | GENESIS GWAS                              | 0.32                                       | ↓   | 0.048     | ↓   | 0.36       | ↓   | 0.24      | 0   |           |     |
| <b>Liver traits</b>               |                                           |                                            |     |           |     |            |     |           |     |           |     |
| Alkaline phosphatase              | Liver function GWAS                       | 0.53                                       | 0   | ND        |     | 0.004      | ↑   | 0.57      | ↑   |           |     |
| Bilirubin                         | BioBank Japan GWAS                        | 0.019                                      | ↑   | 0.53      | 0   | 0.024      | ↑   | 0.38      | ↑   |           |     |
| Serum albumin                     | BioBank Japan GWAS                        | 0.026                                      | ↑   | 0.78      | 0   | 0.033      | ↑   | 0.33      | 0   |           |     |
| <b>Lipid traits</b>               |                                           |                                            |     |           |     |            |     |           |     |           |     |
| Hyperlipidemia                    | UKB SAIGE                                 | 5.9E-07                                    | ↑   | 1.2E-06   | ↑   | 0.002      | ↑   | 0.004     | ↑   |           |     |
| Hypercholesterolemia              | UKB SAIGE                                 | 6.3E-06                                    | ↑   | 1.5E-05   | ↑   | 0.018      | ↑   | 0.025     | ↑   |           |     |
| <b>Sleep and circadian traits</b> |                                           |                                            |     |           |     |            |     |           |     |           |     |
| Excessive daytime sleepiness      | UK Biobank Sleep Traits GWAS: Self-report | 0.009                                      | ↑   | 0.046     | ↑   | 0.0029     | ↑   | 0.0027    | ↑   |           |     |
| Long sleep duration               | UK Biobank Sleep Traits GWAS: Self-report | 0.021                                      | ↑   | 0.16      | ↑   | 0.019      | ↑   | 0.017     | ↑   |           |     |
| Short sleep duration              | UK Biobank Sleep Traits GWAS: Self-report | 0.18                                       | ↑   | 0.08      | ↑   | 0.00016    | ↑   | 1.8E-05   | ↑   |           |     |

P-values for reported GWAS associations in DIAMANTE and other public databases ([www.type2diabetesgenetics.org](http://www.type2diabetesgenetics.org); date 10/2020) are shown for the 4 credible SNPs (posterior probability of association >1%) associated with T2D in the *ONECUT1*-associated genomic region (99% genetic credible SNPs; Mahajan et al.<sup>5</sup>).

The direction of effect (dir), corresponding to the T2D-associated allele, is shown by an arrow (increased risk: up arrow, decreased risk: down arrow). ND: not done. Red:  $P < 5 \times 10^{-8}$  (genome-wide significant); orange:  $P < 5 \times 10^{-4}$  (locus-wide significant); light orange:  $P < 0.05$  (nominal significant).

**Supplementary Table 10. ACMG status of rare *ONECUT1* coding variants identified in the heterozygous status in diabetic patients and control variants**

|                                                                                                                   |                  | Population association data                                            |                                                                              |           | Segregation data                        | Pathogenicity data                                                                 |                                      | ACMG status                   |            |
|-------------------------------------------------------------------------------------------------------------------|------------------|------------------------------------------------------------------------|------------------------------------------------------------------------------|-----------|-----------------------------------------|------------------------------------------------------------------------------------|--------------------------------------|-------------------------------|------------|
| AA change                                                                                                         | Allele frequency | Ulm diabetes cohort: het_cases/het_controls (2165 cases, 559 controls) | AMP T2D-GENES: OR, P, het_cases/het_controls (19,852 cases, 23,273 controls) | ACMG code | Adult/Juvenile-onset diabetes           | Computational data: number of pathogenic/benign predictions; Other characteristics | In vitro functional data (our study) | Final evidence                | Conclusion |
| <b>Variants causing monogenic recessive syndromic diabetes and monogenic dominant diabetes (Families 1 and 2)</b> |                  |                                                                        |                                                                              |           |                                         |                                                                                    |                                      |                               |            |
| E231X                                                                                                             | PM2              | Absent                                                                 | Absent                                                                       | -         | Dominant transmission, Family 1 (PP1++) | 4/0 (PP3); null variant (PVS1)                                                     | Deleterious+ (PS3+)                  | PM2, PP1+, PP3, PVS1, PS3+    | P          |
| E231D                                                                                                             | PM2              | Absent                                                                 | Absent                                                                       | -         | Dominant transmission, Family 2 (PP1+)  | 2/9 (BP4); missense intolerant (PP2)                                               | Deleterious+ (PS3+)                  | PM2, PP1+, BP4, PS3+, PP2     | P          |
| <b>Variants identified by population screening (Ulm diabetes cohort)</b>                                          |                  |                                                                        |                                                                              |           |                                         |                                                                                    |                                      |                               |            |
| A3P                                                                                                               | PM2              | 1/0                                                                    | Absent                                                                       | PS4-      | Dominant family history (PP4)           | 3/7 (BP4); missense intolerant (PP2)                                               | ND                                   | PM2, PS4-, PP4, BP4, PP2      | L.P        |
| G30S                                                                                                              | PM2              | 1/0                                                                    | OR=9.8, P=0.16<br>18/5                                                       | PS4       | Dominant family history (PP4)           | 2/8 (BP4); missense intolerant (PP2)                                               | Deleterious (PS3)                    | PM2, PS4, PP4, BP4, PP2, PS3  | P          |
| H33Q                                                                                                              | PM2              | 3/0                                                                    | OR=4.95, P=0.079<br>50/41                                                    | PS4       | Dominant family history (PP4)           | 7/3 (PP3); missense intolerant (PP2)                                               | Deleterious (PS3)                    | PM2, PS4, PP4, PP3, PP2, PS3  | P          |
| G62C                                                                                                              | PM2              | 1/0                                                                    | OR=4.14, P=0.54<br>3/0                                                       | PS4       | Dominant family history (PP4)           | 6/4 (PP3); missense intolerant (PP2)                                               | ND                                   | PM2, PS4, PP4, PP3, PP2       | P          |
| G81D                                                                                                              | PM2              | 1/0                                                                    | OR=0.80, P=0.59<br>16/19                                                     | -         | Dominant family history (PP4)           | 5/5 (NE); missense intolerant (PP2)                                                | Deleterious (PS3)                    | PM2, PP4, PP2, PS3            | L.P        |
| G96C                                                                                                              | PM2              | 1/0                                                                    | Absent                                                                       | PS4-      | Dominant family history (PP4)           | 8/2 (PP3); missense intolerant (PP2)                                               | ND                                   | PM2, PS4-, PP4, PP3, PP2      | L.P        |
| G96D*                                                                                                             | PM2              | 1/0                                                                    | NA for G96D/P75A*                                                            | -         | Dominant family history (PP4)           | 8/2 (PP3); missense intolerant (PP2)                                               | ND                                   | PM2, PP4, PP3, PP2            | L.P        |
| P113A                                                                                                             | PM2              | 1/0                                                                    | Absent                                                                       | PS4-      | Dominant family history (PP4)           | 5/5 (NE); missense intolerant (PP2)                                                | ND                                   | PM2, PS4-, PP4, PP2           | L.P        |
| P215A                                                                                                             | PM2              | 1/0                                                                    | Absent                                                                       | PS4-      | Dominant family history (PP4)           | 5/6 (BP4); known pathogenic AA (PM5); missense intolerant (PP2)                    | ND                                   | PM2, PS4-, PP4, BP4, PM5, PP2 | L.P        |
| R269G                                                                                                             | PM2              | 2/0                                                                    | OR=1.3, P=0.47<br>20/21***                                                   | PS4       | Dominant family history (PP4)           | 6/5 (PP3); missense intolerant (PP2)                                               | ND                                   | PM2, PS4, PP4, PP3, PP2       | L.P        |

| Mutation occurring <i>de novo</i> in a juvenile-onset insulin-treated diabetic patient (Lebanon) |       |        |                           |     |   |                                                                     |                   |                         |     |
|--------------------------------------------------------------------------------------------------|-------|--------|---------------------------|-----|---|---------------------------------------------------------------------|-------------------|-------------------------|-----|
| P215R                                                                                            | PM2   | Absent | Absent                    | -   | - | 9/2 (PP3); <i>de novo</i> mutation (PS2); missense intolerant (PP2) | Deleterious (PS3) | PM2, PP3, PS2, PP2, PS3 | P   |
| T2D risk variant, AMP T2D-GENES                                                                  |       |        |                           |     |   |                                                                     |                   |                         |     |
| V242A                                                                                            | PM2   | Absent | OR=1.4, P=0.026<br>101/75 | PS4 | - | 4/6 (BP4); missense intolerant (PP2)                                | Deleterious (PS3) | PM2, PS4, BP4, PP2, PS3 | P   |
| Control variants, selected as likely neutral                                                     |       |        |                           |     |   |                                                                     |                   |                         |     |
| D26E                                                                                             | BS1** | Absent | OR=0.99, P=0.98<br>66/50  | -   | - | 2/7 (BP4); missense intolerant (PP2)                                | Neutral (BS3)     | BS1, BP4, PP2, BS3      | B   |
| K412R                                                                                            | PM2   | Absent | OR=1.11, P=0.95<br>1/1    | -   | - | 4/2 (PP3); missense intolerant (PP2)                                | Neutral (BS3)     | PM2, PP3, PP2, BS3      | U.S |

The status was defined according to the American College of Medical Genetics and Genomics (ACMG) recommendations using Varsome tool available online (<http://varsome.com>; date 15/12/2020) on *ONECUT1* RefSeq canonical transcript (NM\_004498.2), integrating information from the present study. Criteria were adjusted based on data from the present study and the specificities of the gene. ND: not done; NA: not available; NE: no evidence.

\*The patient heterozygous for p.G96D (UDC-T2D Patient-4) was also heterozygous for the low frequency p.P75A variant (G96D rare variant and P75A low-frequency variant in trans); \*\* Max MAF=0.014 in AFR population, with 2 homozygous subjects (gnomAD). \*\*\* Additional association data were available for this variant in DIAMANTE GWAS (19852 cases/23273 controls, OR=1.06, P=0.55).

*In vitro* functional evidence are from the present study, coded as follows: deleterious+: assessed by our in-depth functional studies; deleterious, neutral: assessed by luciferase assays only. MAF threshold used for Ulm diabetes population screening: 0.005 in Non-Finnish European/North-West European subgroup.

Prediction programs used (Varsome): DANN, DEOGEN2, FATHMM-MKL, M-CAP, Mutation Assessor, Mutation Taster, Primate AI, Polyphen 2, MVP, EIGEN, REVEL, SIFT, GERP (conservation)

ACMG categories: PVS1: null variant (nonsense, frameshift, canonical +- 2 splice sites, initiation codon, single or multiexon deletion) in a gene where LOF is a known mechanism of disease; PS2: De novo (both maternity and paternity confirmed) in a patient with the disease and no family history; PS3: well-established in vitro or in vivo functional studies supportive of a damaging effect on the gene or gene product; PS3+: PS3 as a very strong evidence due to our in vitro functional studies supportive of a damaging effect on the gene or gene product; PS4: The prevalence of the variant in affected individuals is significantly increased compared with the prevalence in controls; PS4-: PS4 as a moderate evidence (overall significant association in the German T2D population, with specific clinical features); PM2: Absent from controls (or at extremely low frequency if recessive) in Exome Sequencing Project, 1000 Genomes Project, or Exome Aggregation Consortium; PM5: Novel missense change at an amino acid residue where a different missense change determined to be pathogenic has been seen before; PP1: Cosegregation with disease in multiple affected family members in a gene definitively known to cause the disease; PP1+/PP1++ (PP1 as strong/very strong evidence due to increasing segregation data); PP2: low rate benign missense (for rare variants, present study; observed/expected ratio for *ONECUT1* missense variants=0.91 [237/260.8, CI:0.82-1.01] compared to observed/expected ratio for *ONECUT1* synonymous variants=1.04 [115/110.2, CI:0.9-1.22], gnomAD); PP3: Multiple lines of computational evidence support a deleterious effect on the gene or gene product (conservation, evolutionary, splicing impact, etc.); PP4: Patient's phenotype or family history is highly specific for a disease with a single genetic etiology; BS1: Allele frequency is greater than expected for disorder; BS3: Well-established in vitro or in vivo functional studies show no damaging effect on protein function or splicing; BP4: Multiple lines of computational evidence suggest no impact on gene or gene product (conservation, evolutionary, splicing impact, etc.).

Overall conclusion: P: Pathogenic, L.P: Likely pathogenic, U.S: Uncertain significance, B: Benign.
