# Supplementary material
Source: PubMed Central journal article supplement (PMC9356324)

## Extended Data Fig. 2b

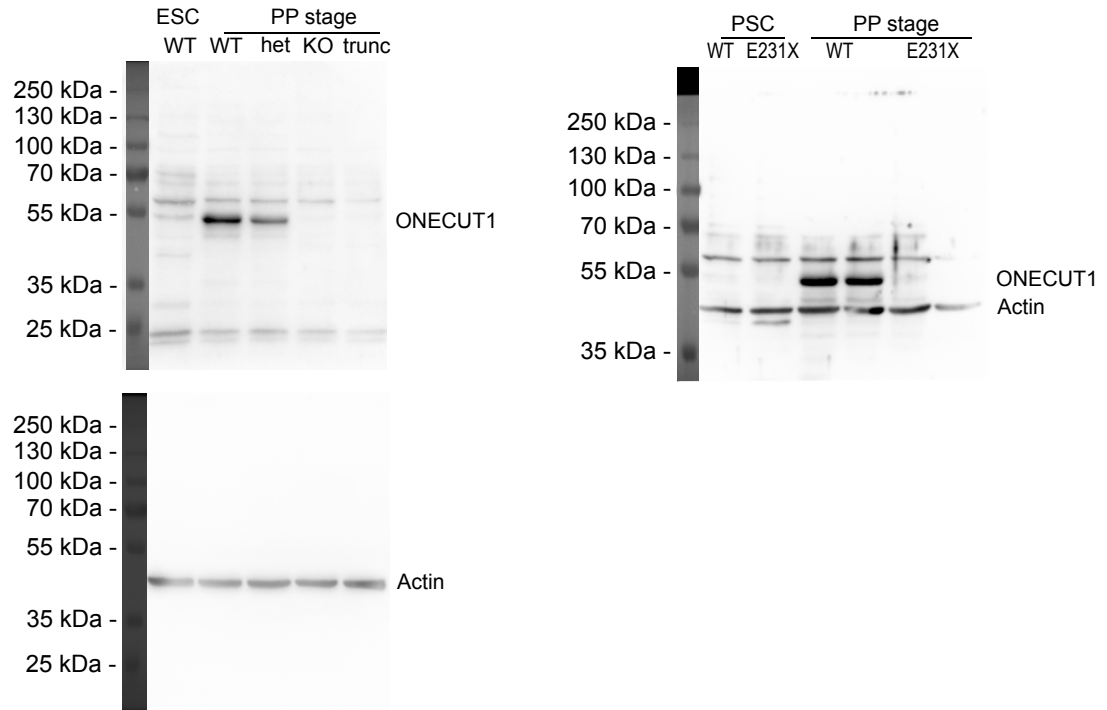

Extended Data Fig. 5d

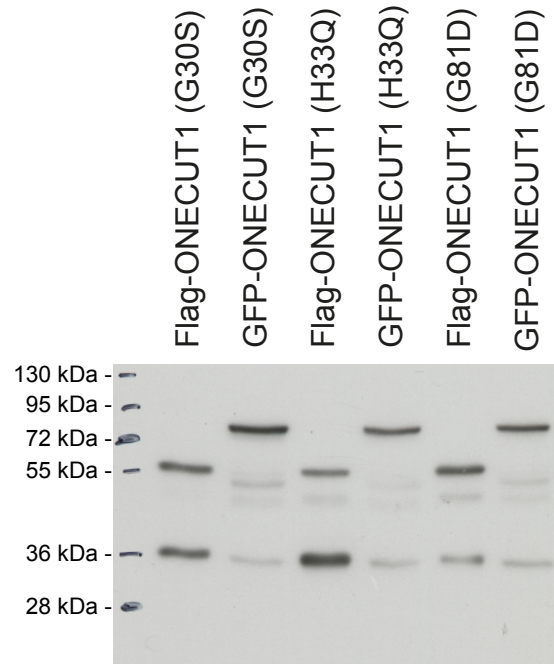

Extended Data Fig. 5e

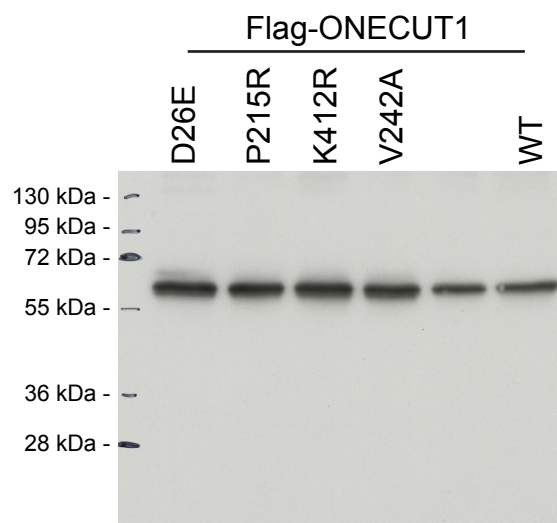



Extended Data Fig. 6d

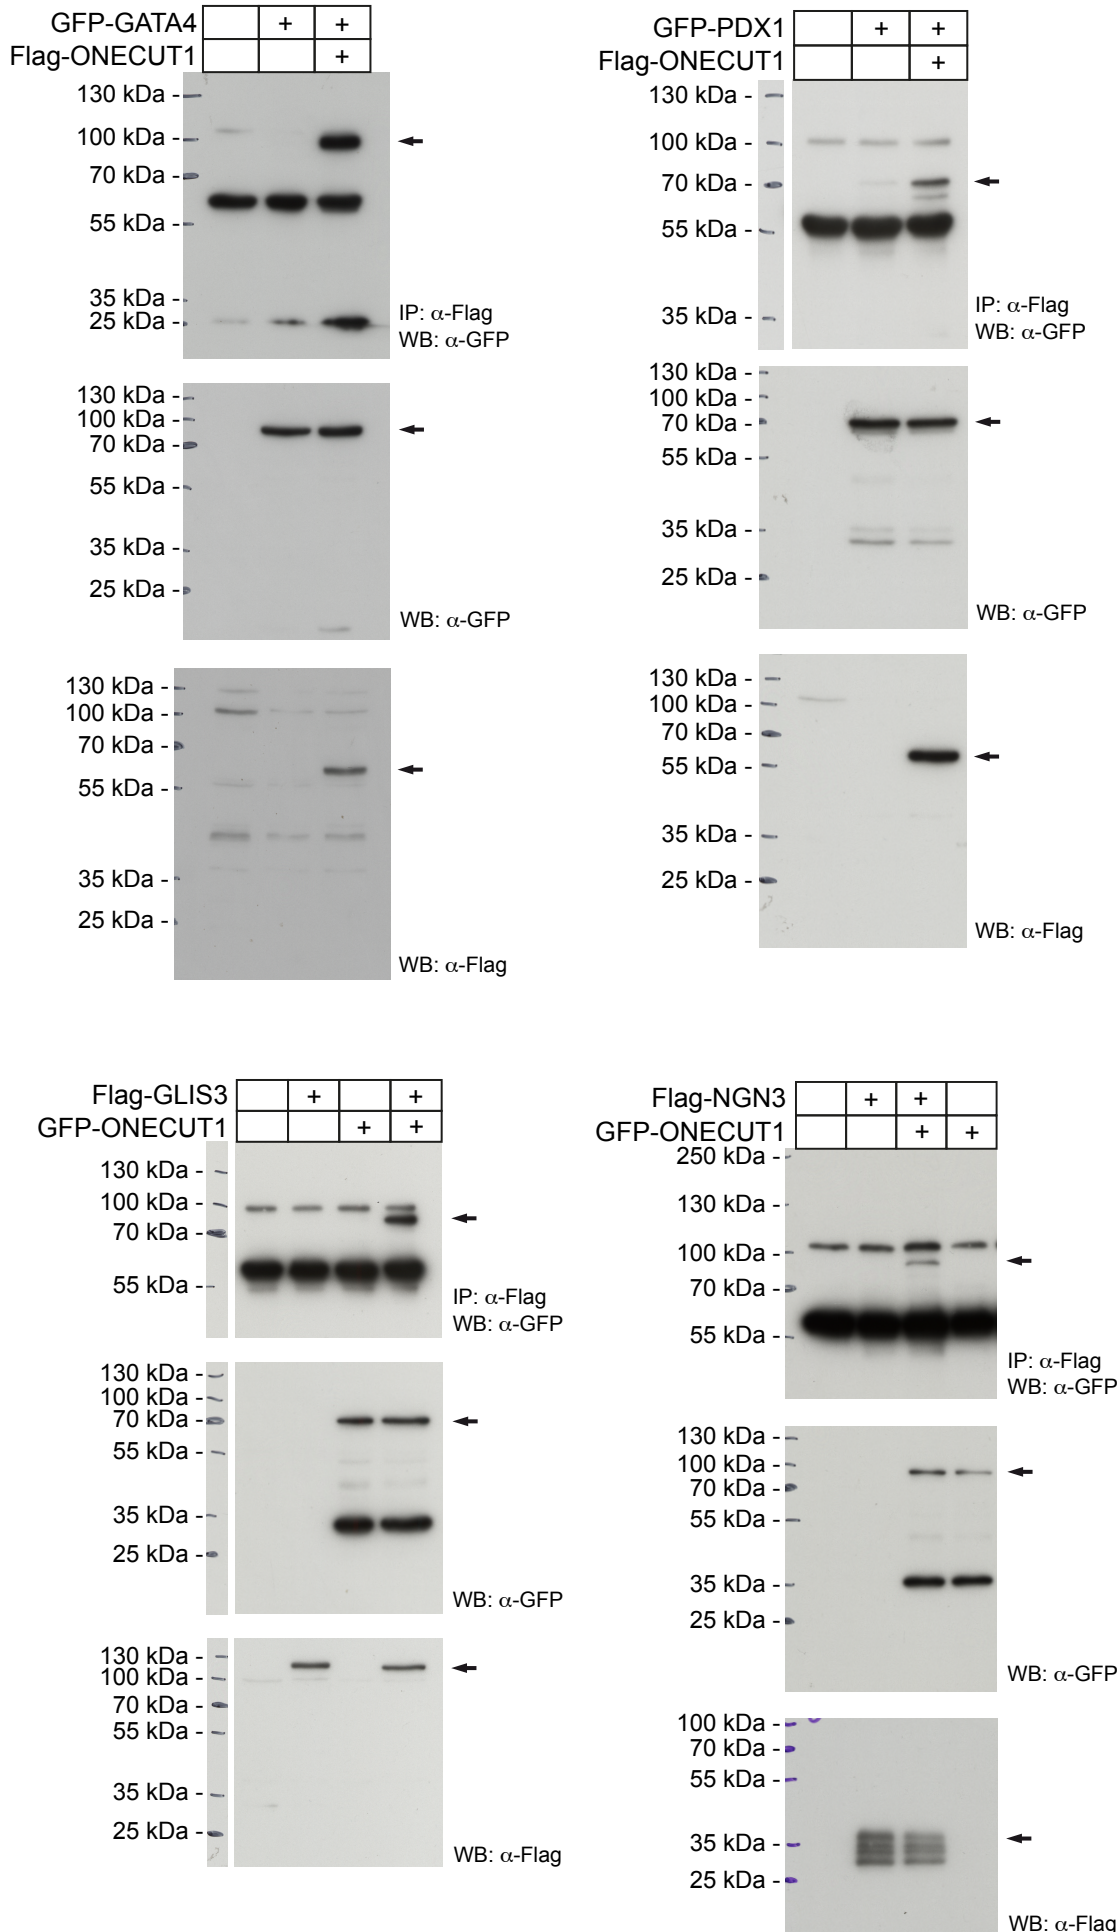

Extended Data Fig. 6e

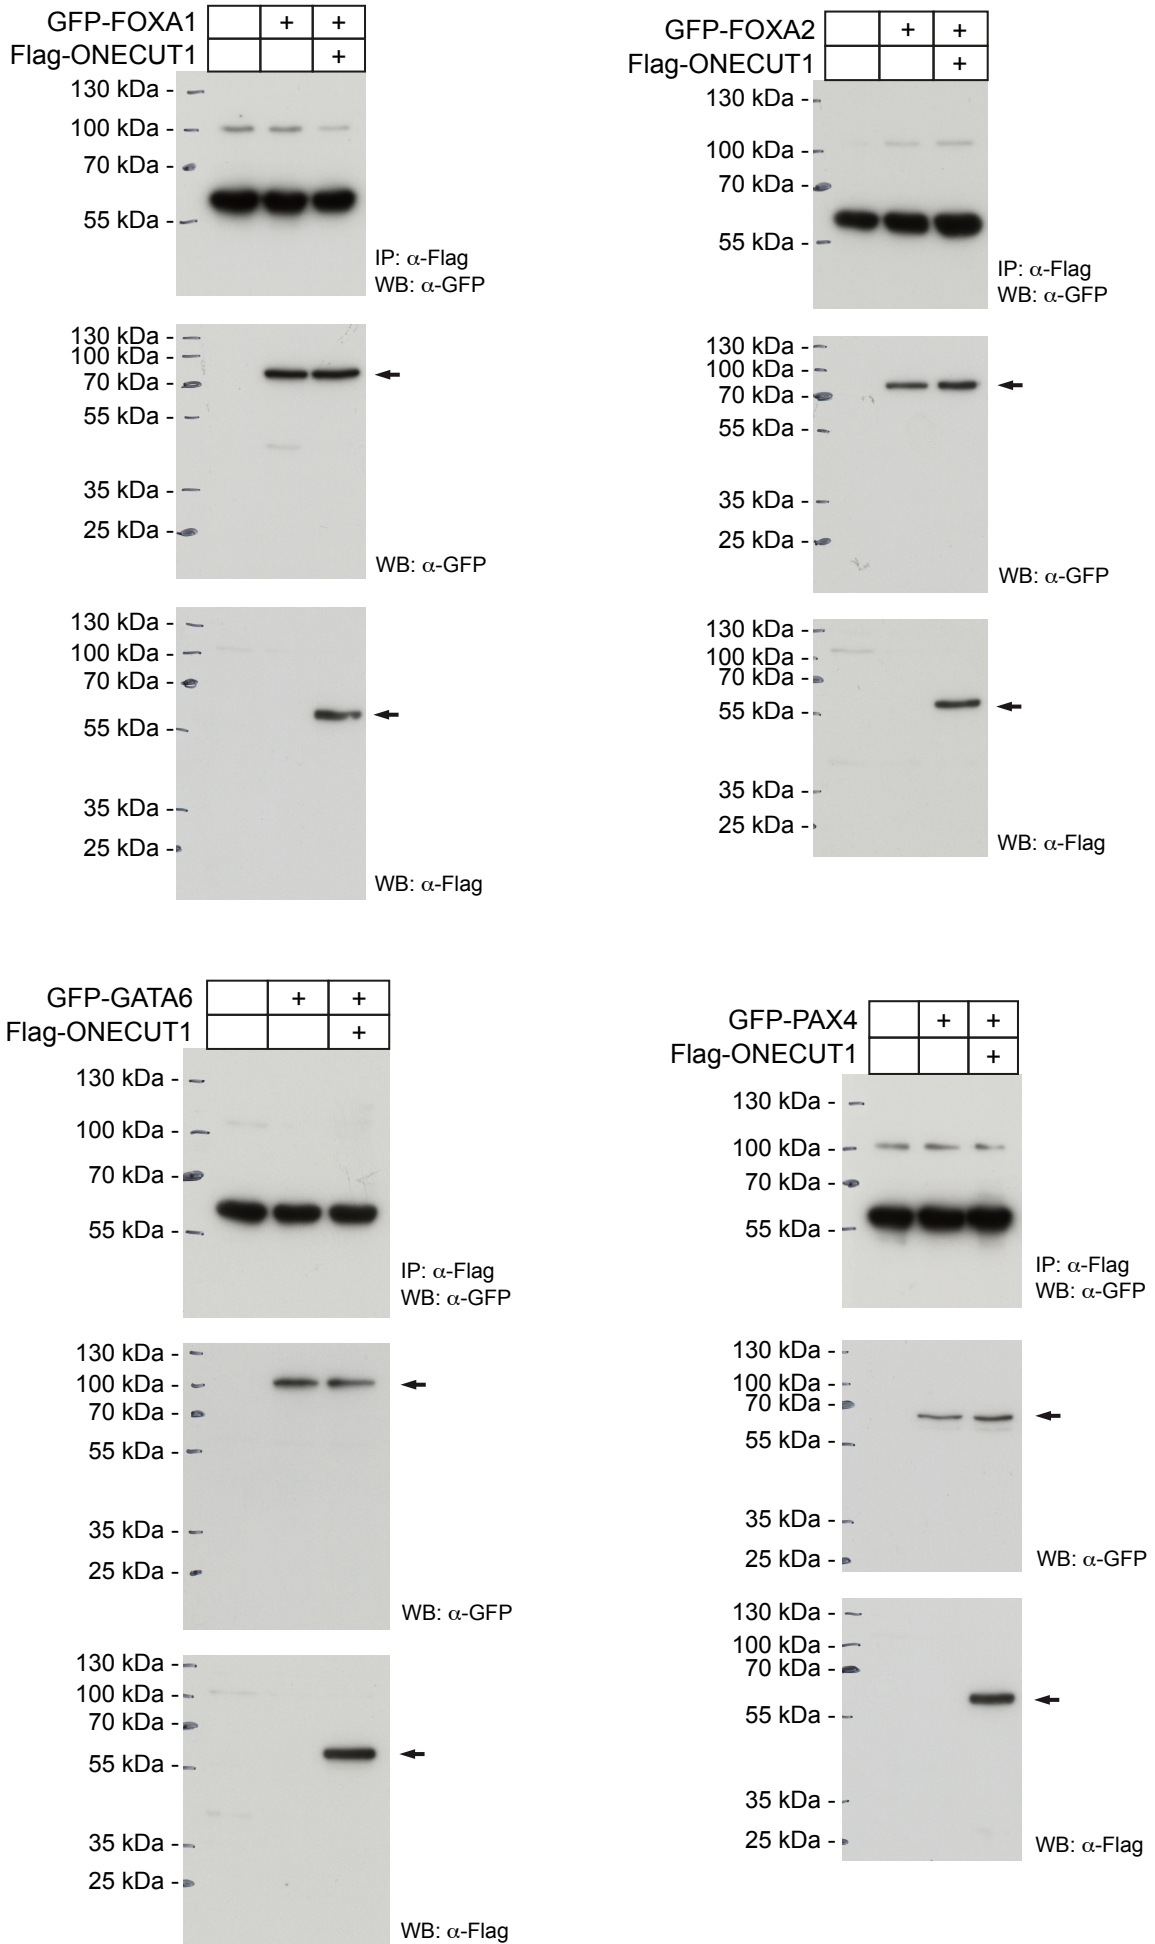

Extended Data Fig. 7a

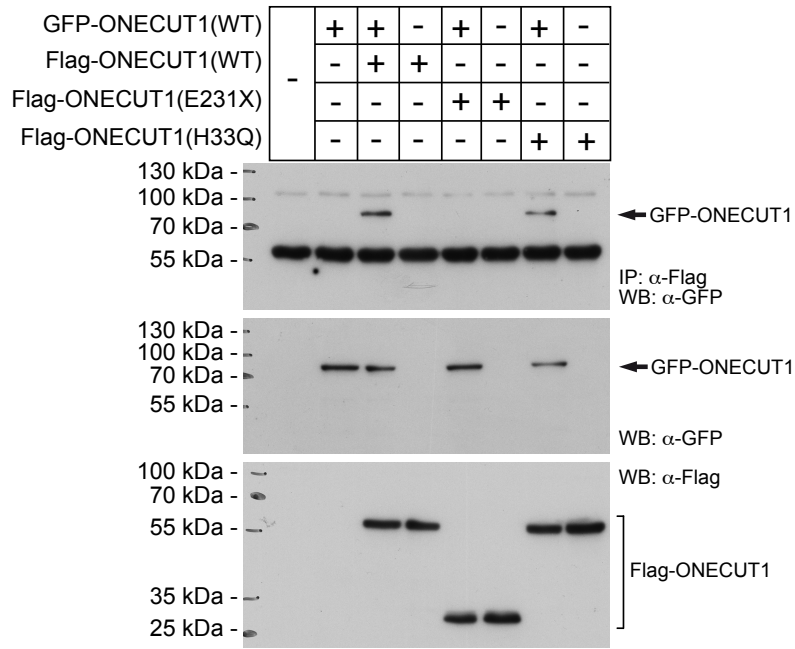

Extended Data Fig. 7b

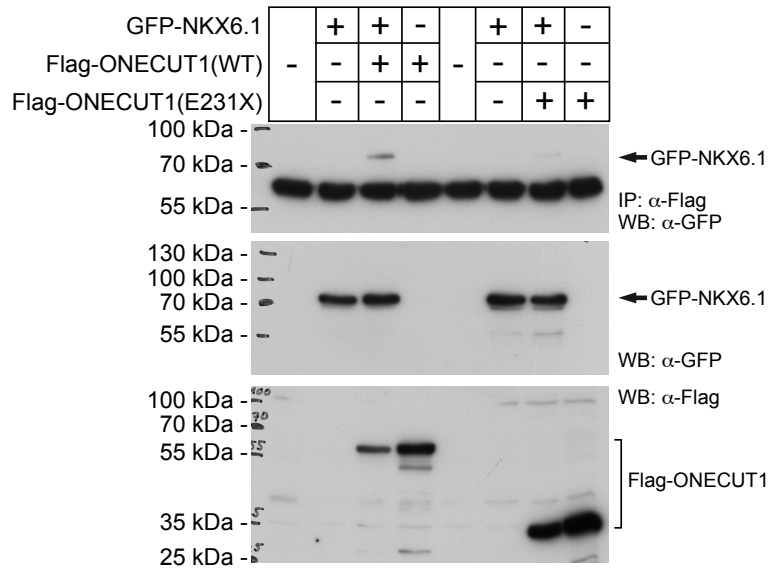

Extended Data Fig. 7c

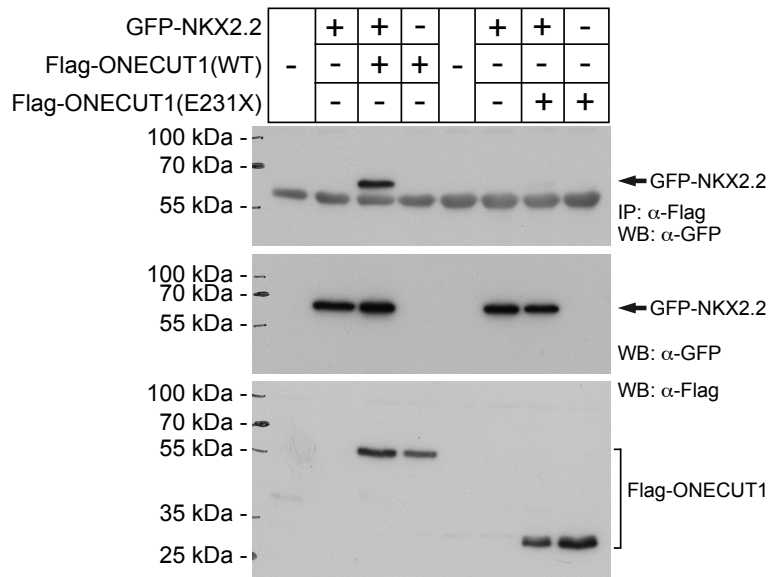

Extended Data Fig. 9f

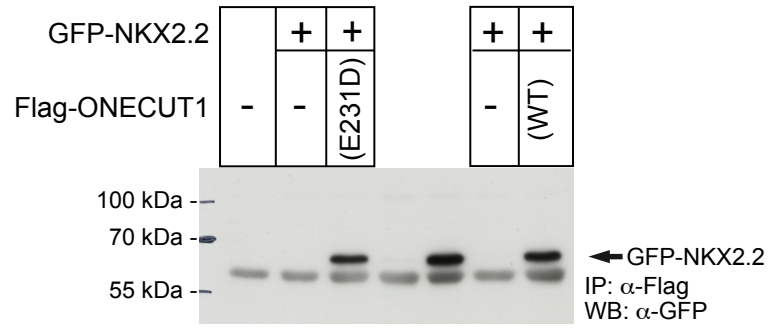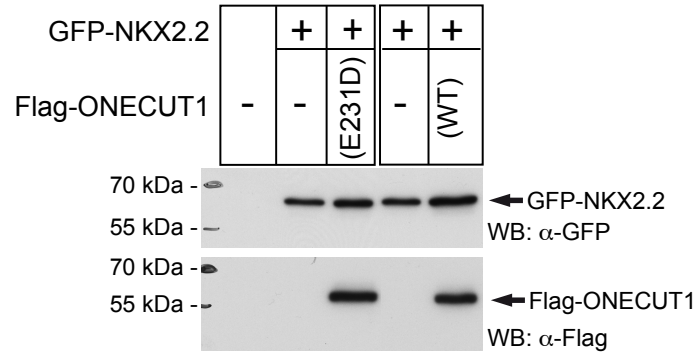

Supplement: NIHMS1815749-supplement-WB_Source_Data.pdf [file NIHMS1815749-supplement-WB_Source_Data.pdf]
