# Supplementary material
Source: PubMed Central journal article supplement (PMC9356324)

## Exemplary flow cytometry gating strategy

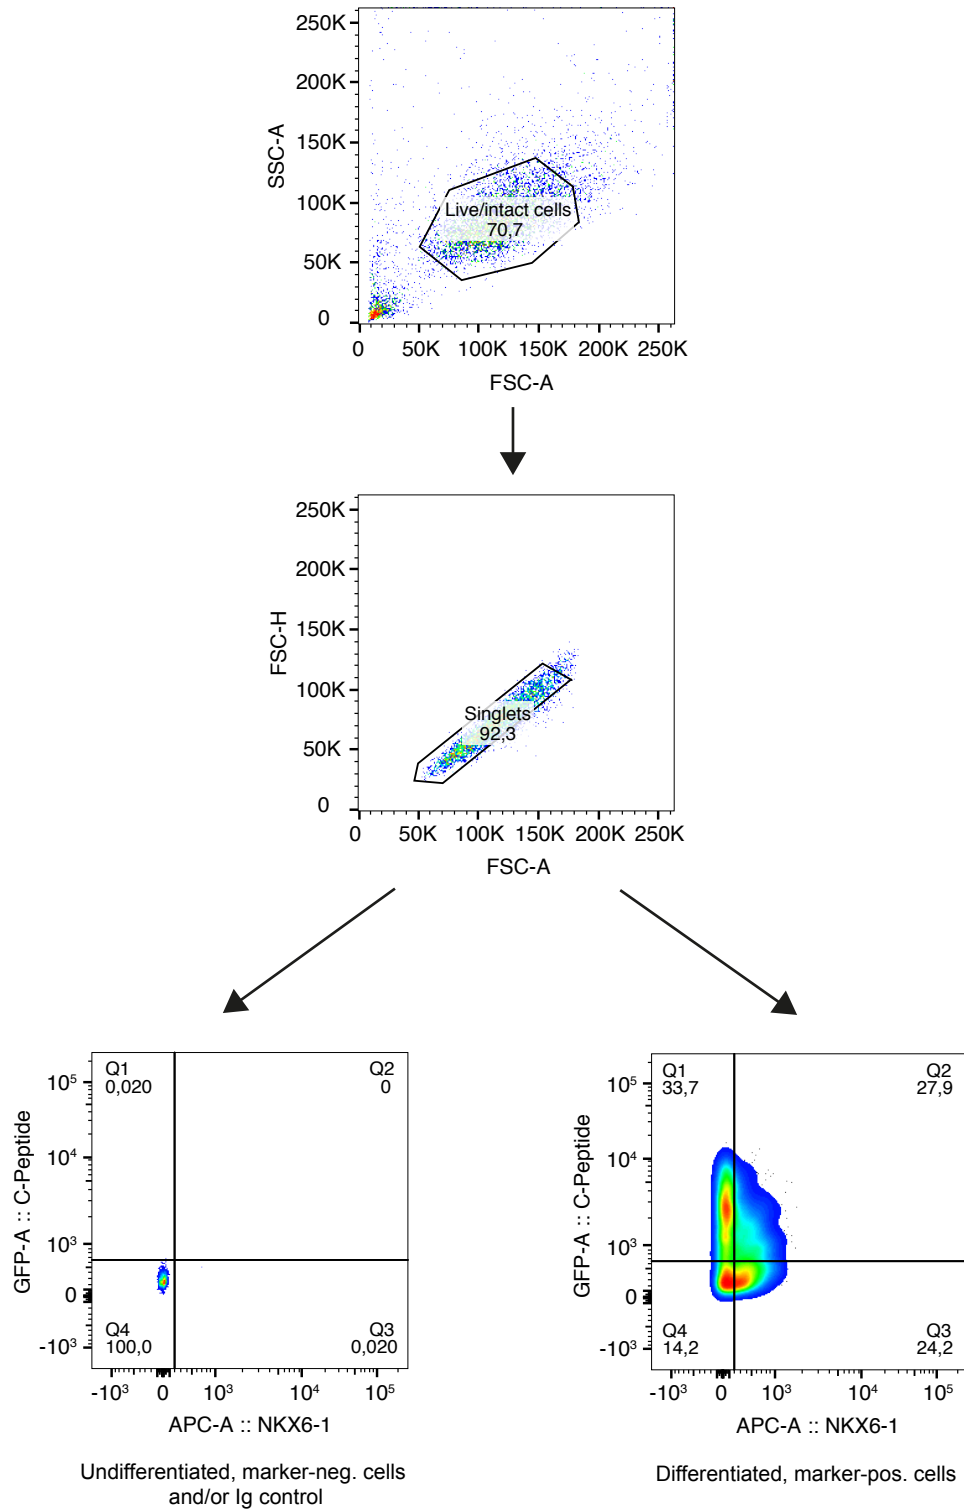

Supplement: NIHMS1815749-supplement-Gating_strategy.pdf [file NIHMS1815749-supplement-Gating_strategy.pdf]
